# Supplementary material
Source: PubMed Central journal article supplement (PMC3018793)
Supplement: emboj2010292s1.pdf [file emboj2010292s1.pdf]

## **Supplemental Figures:**

### **ROS-Mediated Amplification of AKT/mTOR Signaling Pathway Leads to Myeloproliferative Syndrome in Foxo3<sup>-/-</sup> Mice**

**Safak Yalcin, Dragan Marinkovic, Sathish Kumar Mungamuri, Xin Zhang, Wei Tong, Rani Sellers, and Saghi Ghaffari**

#### **Supplemental Figure 1**

**Increased Extramedullary Hematopoiesis of Foxo3<sup>-/-</sup> Mice is Concomitant with Hypocellular Bone Marrow.** Quantification of lineage frequency in wild type and Foxo3<sup>-/-</sup> spleens (A) and bone marrow (B). Student's t-Test. The analyses are from at least four independent experiments.

#### **Supplemental Figure 2**

**Increased Extramedullary Hematopoiesis in the Liver of Foxo3-deficient Mice.** Representative histological hematoxylin and eosin staining of liver sections from Foxo3<sup>+/+</sup> and Foxo3<sup>-/-</sup> mice. Increased extramedullary myeloid hematopoiesis is marked in the liver of Foxo3<sup>-/-</sup> mice. Two to three mice in each group were analyzed in two independent experiments.

#### **Supplemental Figure 3**

**Increased Progenitors in Foxo3<sup>-/-</sup> Hematopoietic Organs.** Distribution and

size of hematopoietic progenitors from blood. The estimated number of cells in each colony was counted. One representative of three independent experiments is shown.

#### **Supplemental Figure 4**

**Reduced Expression of Anti-Oxidant Enzymes in Foxo3-deficient Primitive Hematopoietic Cells.** QRT-PCR gene expression analysis of anti-oxidant enzymes in wild type and Foxo3<sup>-/-</sup> bone marrow lineage negative cells. Quantification of the target genes is relative to the endogenous  $\beta$ -actin transcript level. Results shown as mean  $\pm$  SEM of duplicate analysis of at least 3 cDNAs each generated from pool of two to three wild type and Foxo3<sup>-/-</sup> mice.

#### **Supplemental Figure 5**

**Enhanced ROS Concentration in Highly Enriched Common Myeloid Progenitor Cell Compartment.** ROS-hi concentrations were measured in common myeloid progenitor (CMP) Lin<sup>-</sup> IL-7<sup>-</sup> Sca-1<sup>-</sup> c-kit<sup>+</sup> Fc $\gamma$ R<sup>low</sup> CD34<sup>+</sup> bone marrow compartment freshly isolated from wild type and Foxo3<sup>-/-</sup> mice (n=6). One of two independent experiments is shown.

#### **Supplemental Figure 6**

***In vivo* NAC Treatment in Wild Type and Foxo3-null Mice.** Quantification of total number of myeloid (Mac1/Gr1 positive cells) and B cells (B220 positive

cells) in wild type and Foxo3<sup>-/-</sup> mice, 15 days after daily *in vivo* NAC (100mg/kg) or PBS treatment.

#### **Supplemental Figure 7**

**Increased Activation of AKT/mTOR Signaling Pathway in Foxo3<sup>-/-</sup> Primitive Hematopoietic Progenitor Cell Compartment is Regulated by the Relative Loss of Lnk.** Representative FACS histograms of phosphorylated AKT, mTOR and S6 ribosomal protein in mononuclear bone marrow cells derived from 5-FU-treated wild type or Foxo3<sup>-/-</sup> mice and retrovirally transduced with MIG-Lnk or with MIG vector control. Cells were harvested 48 hr after transduction and starved in IMDM 0.1% FCS *in vitro* for 2 hours. Intracellular pSer473AKT (upper left panel), pSer2448 mTOR (upper right panel) and pSer235/236 S6 (lower panel) were measured in GFP positive cells stimulated or not with IL-3.

#### **Supplemental Figure 8.**

**ROS-dependent Regulation of Lnk mRNA Expression.** QRT-PCR expression analysis of Lnk was performed in total bone marrow cells isolated from wild type mice and treated *in vitro* with or without the indicated concentration of H<sub>2</sub>O<sub>2</sub> for 6 hours (n=2).

#### **Supplemental Figure 9.**

**Impact of Rapamycin on ROS in Primitive Myeloid Progenitor Cells.**

Endogenous ROS concentrations were measured in freshly isolated Lin<sup>-</sup> IL7R $\alpha$ <sup>-</sup> Sca-1<sup>-</sup> c-Kit<sup>+</sup> cells from wild type or Foxo3<sup>-/-</sup> mice treated *in vivo* five days a week for 12 days with rapamycin (4mg/kg) or vehicle alone; results are shown as fold change in MFI of ROS-hi in Foxo3<sup>-/-</sup> Lin<sup>-</sup> IL7R $\alpha$ <sup>-</sup> Sca-1<sup>-</sup> c-Kit<sup>+</sup> cells as compared to their wild type counterpart treated with PBS; Student's t-Test, n=3. One of two independent experiments is shown.

### **Supplemental Figure 10**

**Increased Myeloid but not T Cell Lineage in Foxo3<sup>-/-</sup> Spleens.** Frequency of myeloid (Mac-1 and Gr-1 positive) and T (CD4 or CD8 positive) cells in the spleen of wild type or Foxo3<sup>-/-</sup> mice was analyzed by flow cytometry. Representative results from three independent experiments.

Supplemental Figure 1

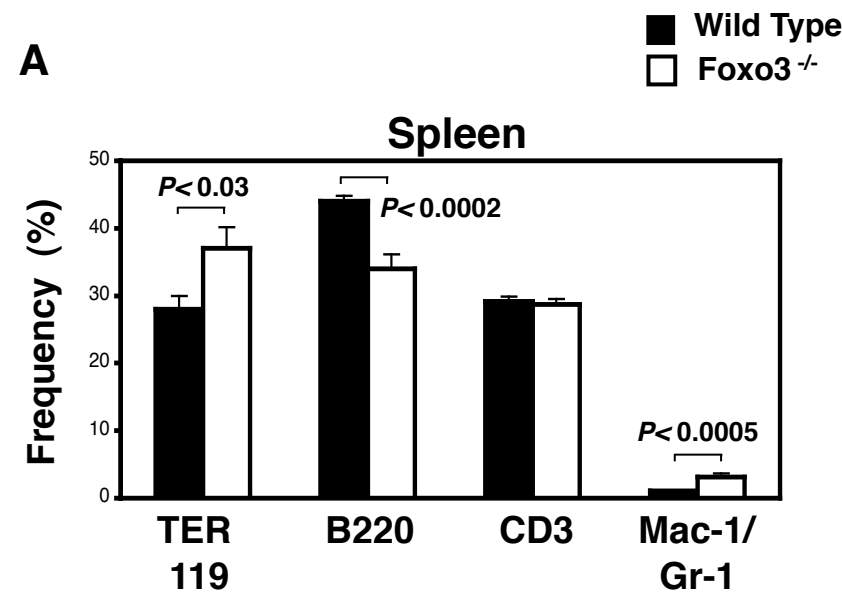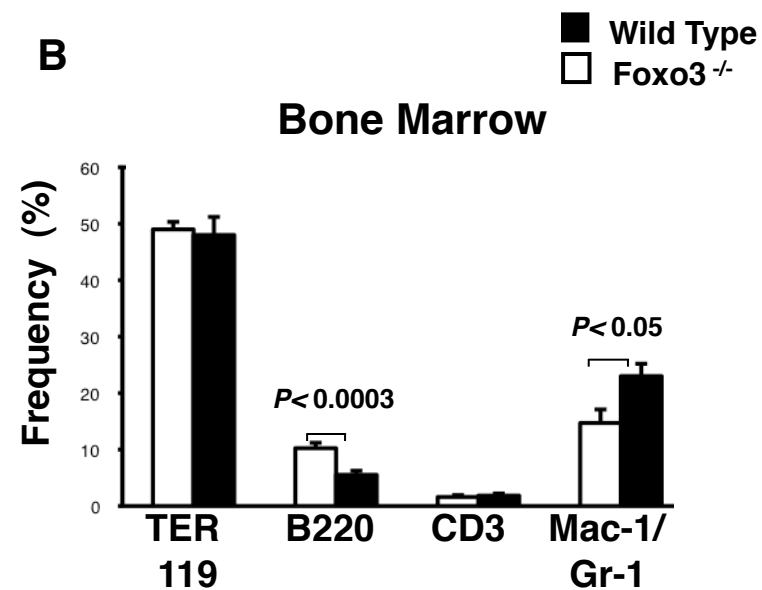

Supplemental Figure 2

Liver

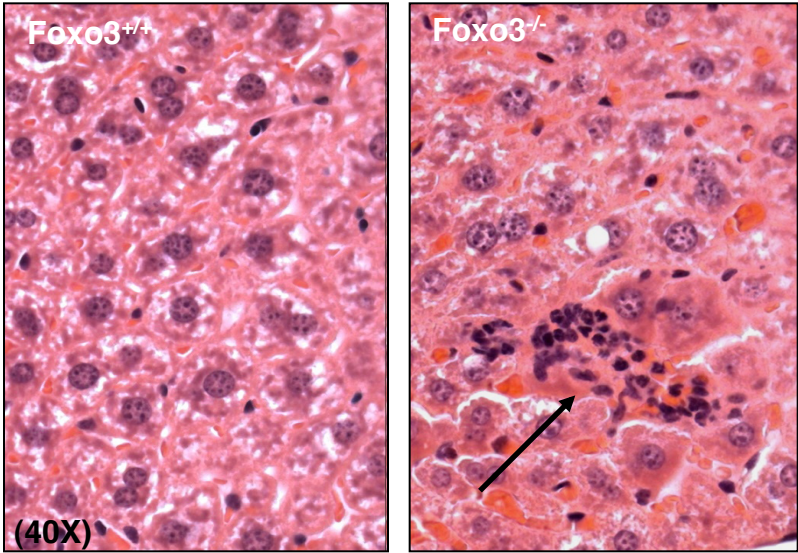

Supplemental Figure 3

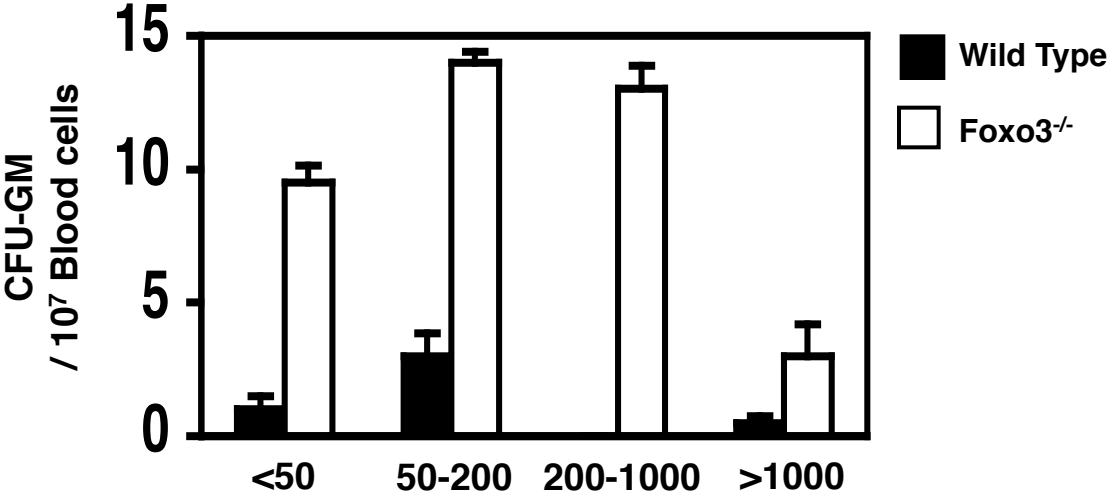

Supplemental Figure 4

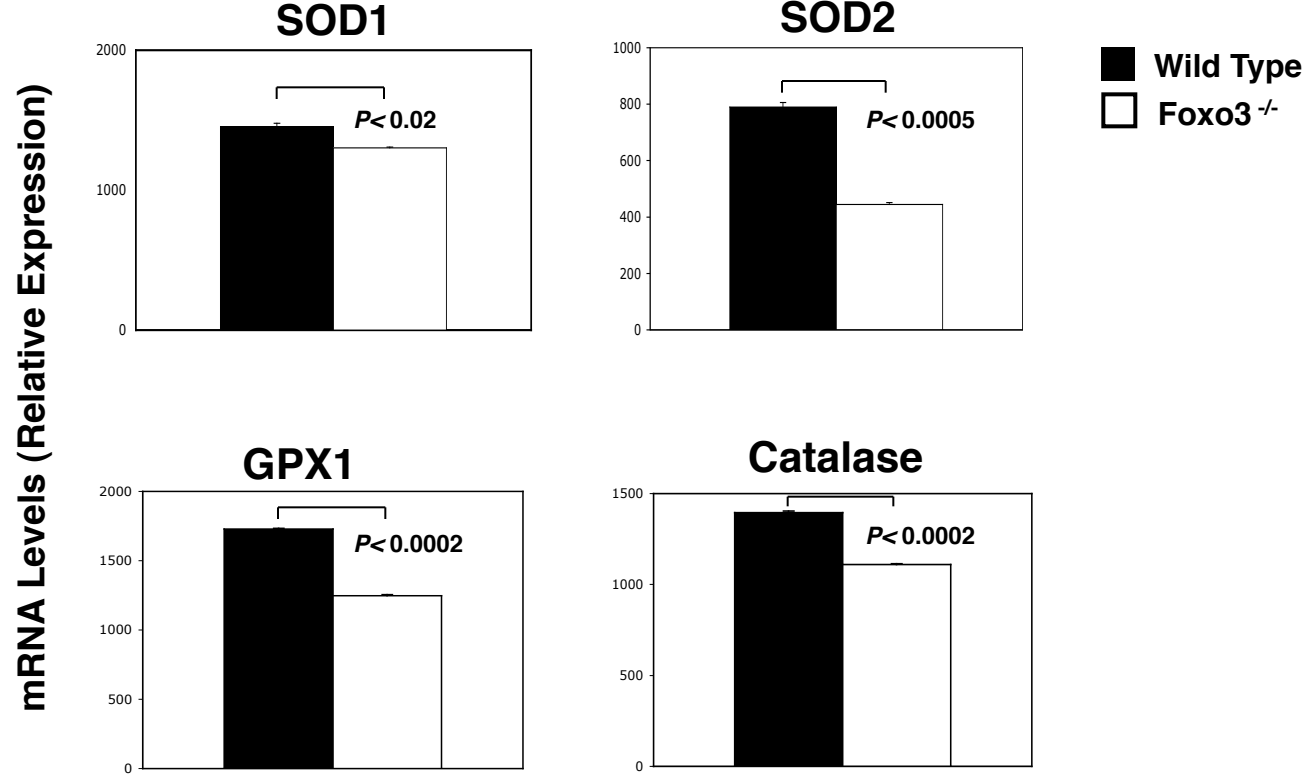

Supplemental Figure 5

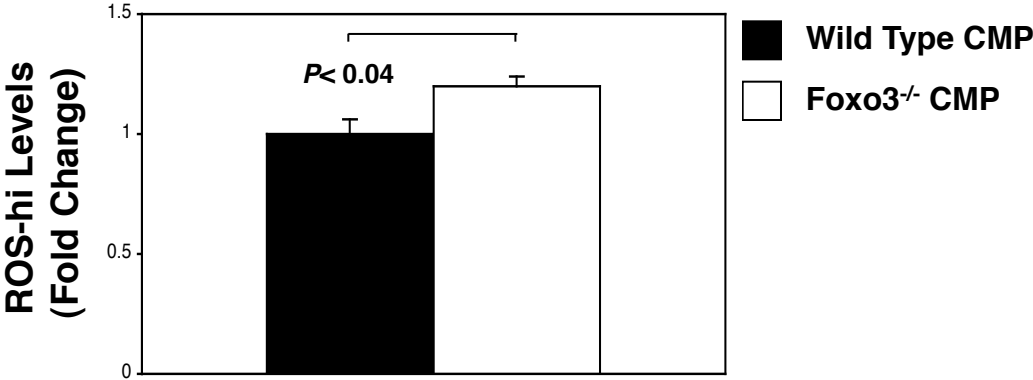

Supplemental Figure 6

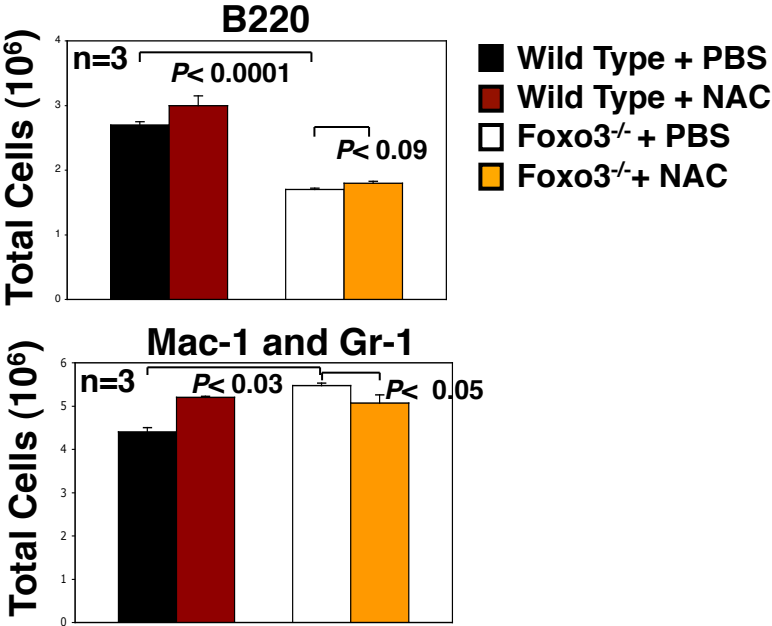

Supplemental Figure 7

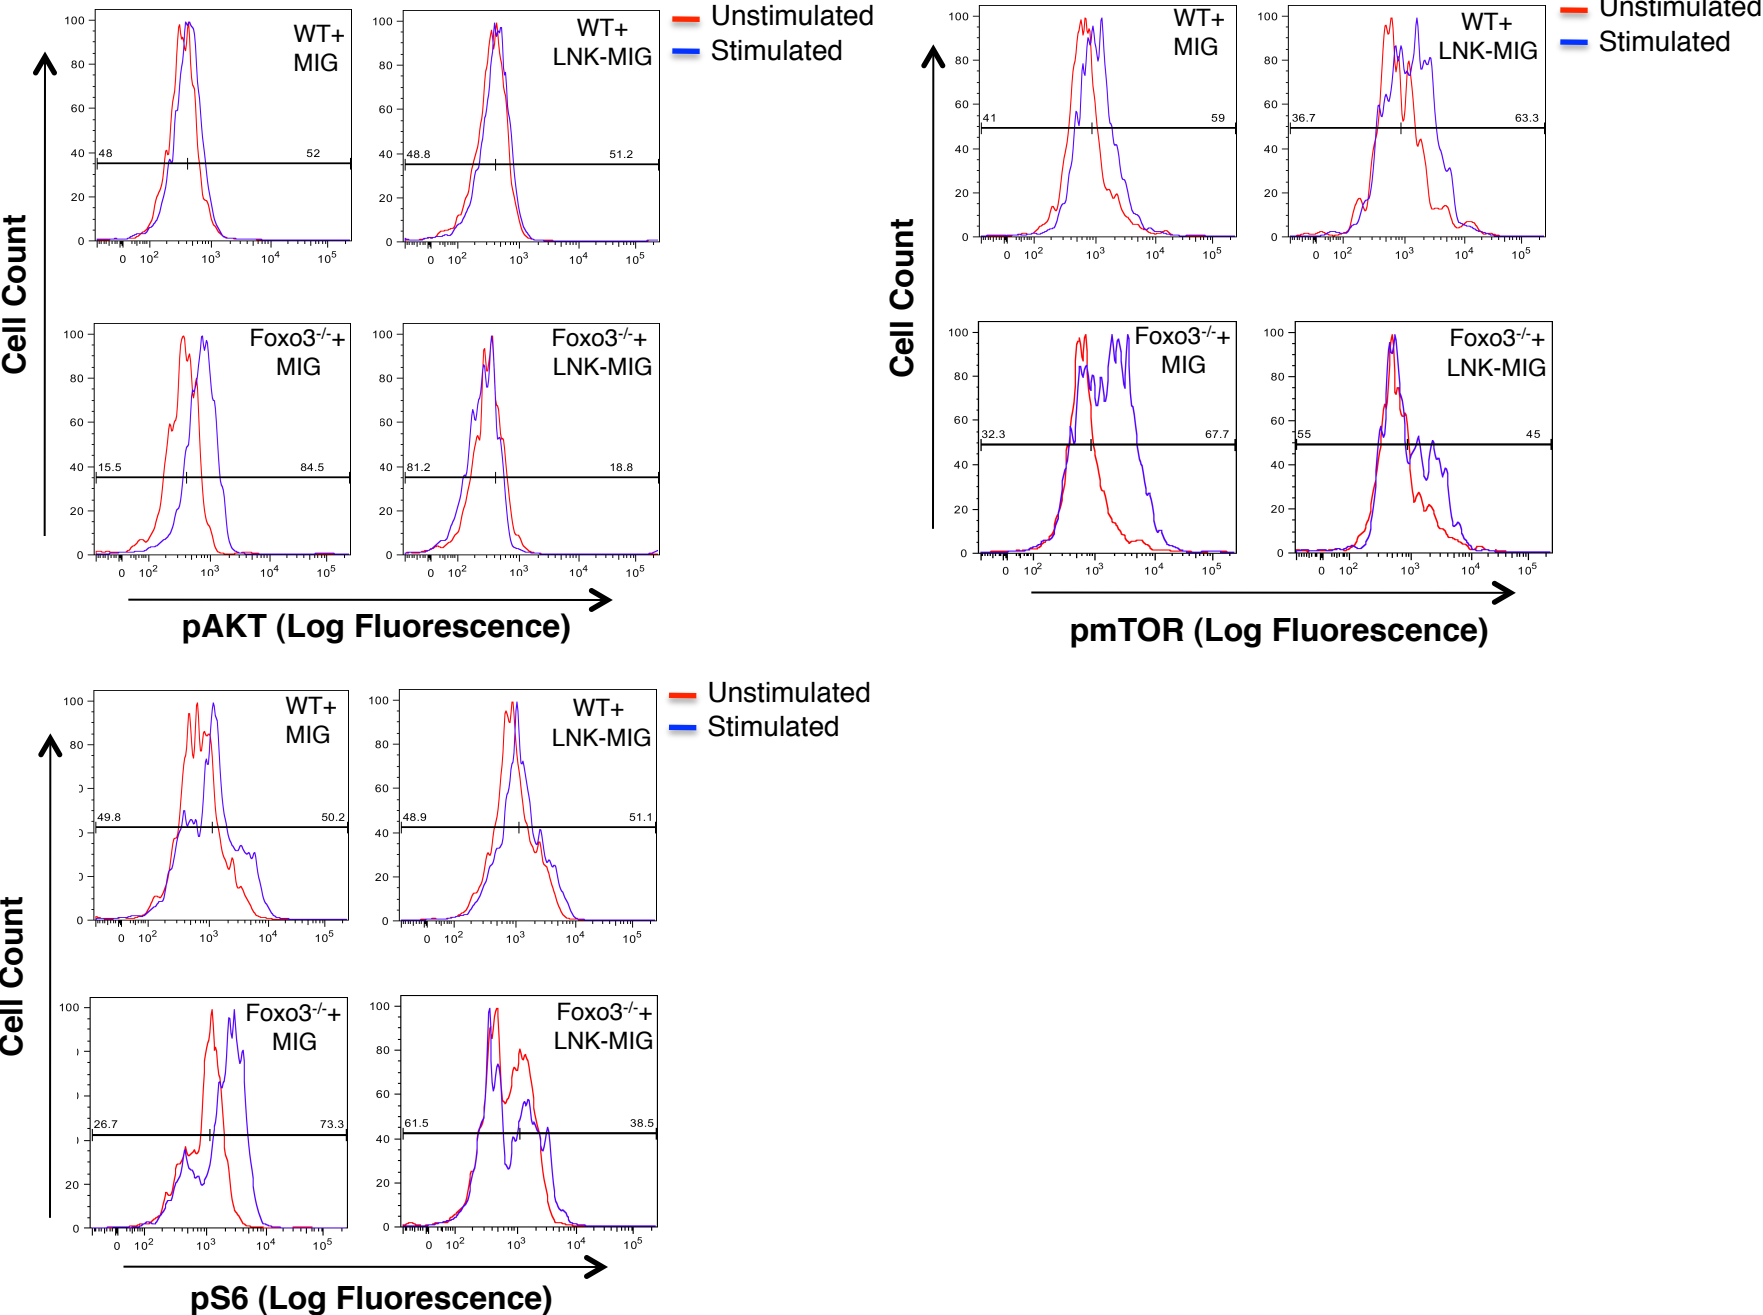

Supplemental Figure 8

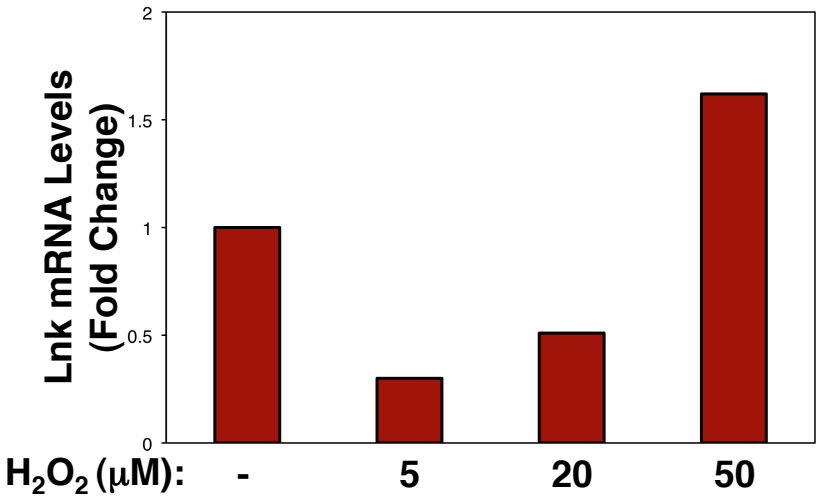

Supplemental Figure 9

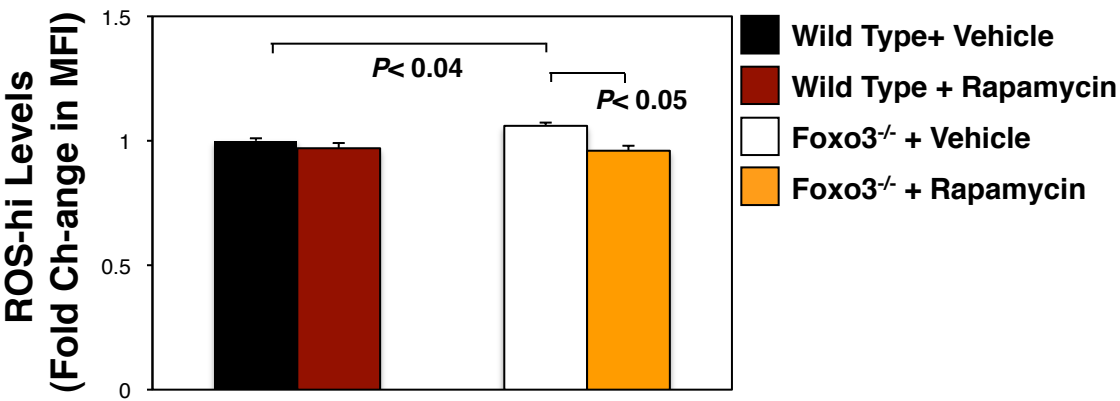

Supplemental Figure 10

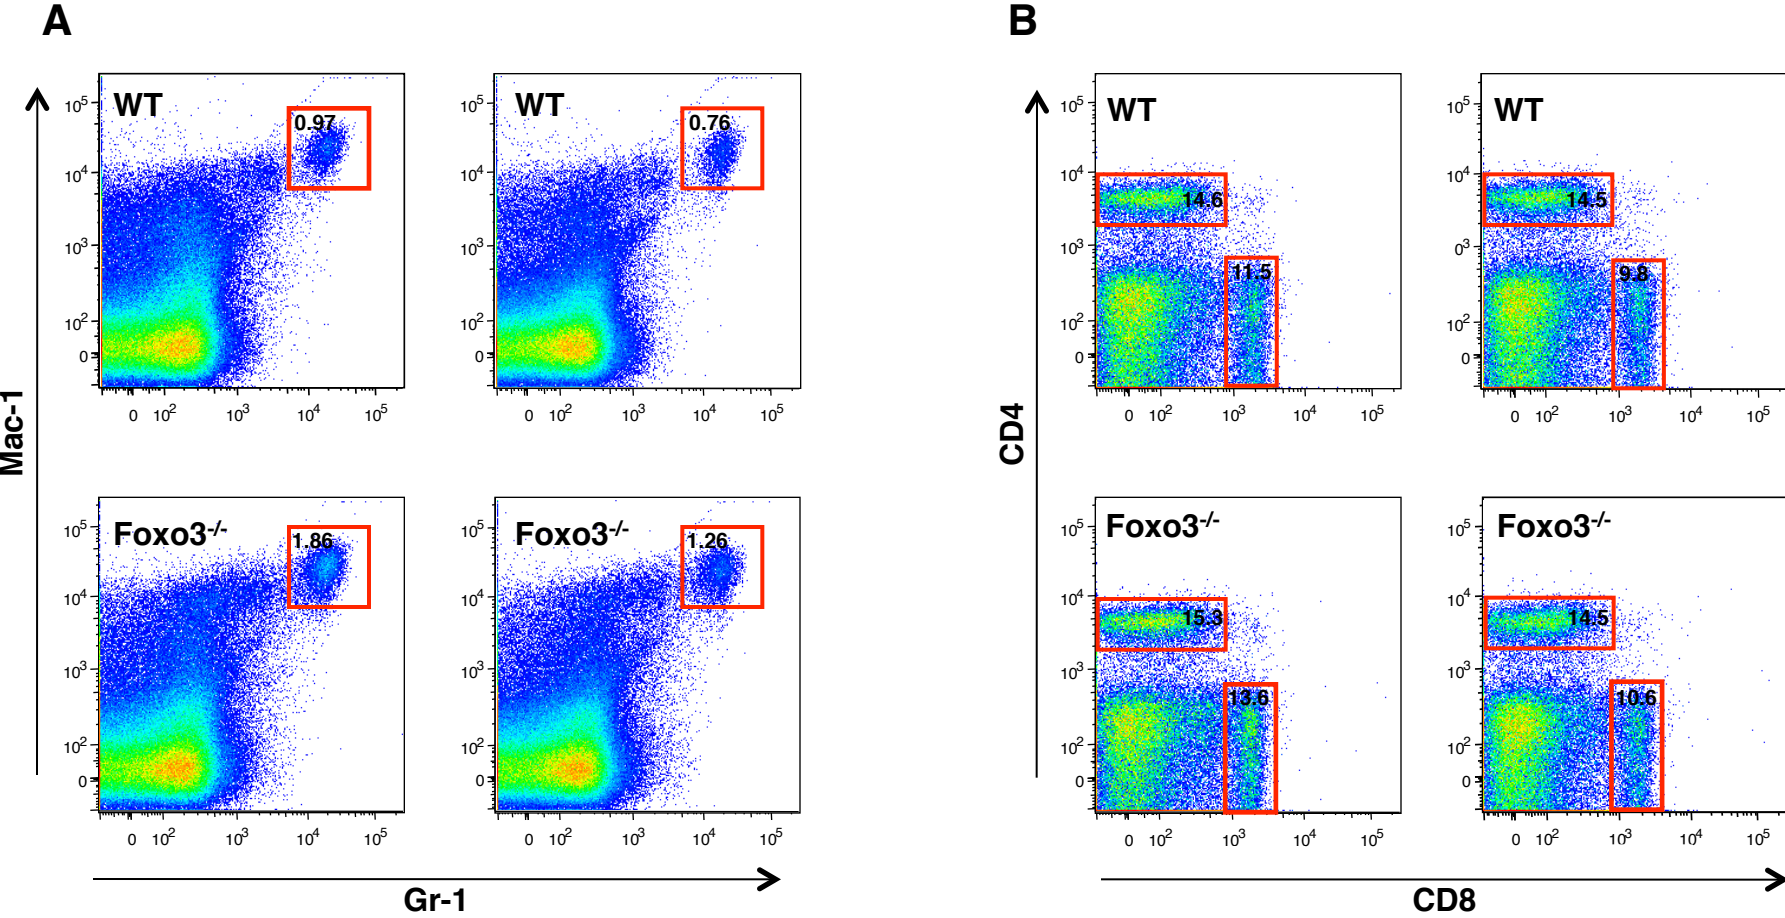

**Supplemental Table 1. QRT-PCR Primer Sets**

| <b>Primer</b>      | <b>Forward sequence</b>       | <b>Reverse sequence</b>         |
|--------------------|-------------------------------|---------------------------------|
| <b>SH2B1</b>       | 5'-AGGGACAGTTCATCCCCTCTCTA-3' | 5'-CTTCTAACACTAACTGGGCAGCTTT-3' |
| <b>SH2B2(APS)</b>  | 5'-GAGTGTGTGCTGACCTTCAACTT-3' | 5'-GAAGTGACGGAGCATATCAAACA-3'   |
| <b>SH2B3 (LNK)</b> | 5'-AGCCACTTTCTGCAGCTCTTC-3'   | 5'-GTAGAGGTTGTCAGGCATCTCC-3'    |
| <b>SHIP</b>        | 5'-GAGGAGGAGGATGCTATTGATG-3'  | 5'-TCTCTGTTGCAAGAGGAAGGTC-3'    |
| <b>SHP1</b>        | 5'-GTAAACGCAGCTGACATTGAGA-3'  | 5'-CCTTCCAGACGTTGGTGTAGAT-3'    |
| <b>SOCS</b>        | 5'-AGAGAATGAACCGAAGGTGCTA-3'  | 5'-CTGTCTCGAACTAGGAATGTACCC-3'  |
| <b>PTEN</b>        | 5'-ATGTGGCGGGACTCTTTGT-3'     | 5'-AGCGGCTCAACTCTCAAACCTT-3'    |
| <b>SOD1</b>        | 5'-GAGACCTGGGCAATGTGACT-3'    | 5'-TTGTTTCTCATGGACCACCA-3'      |
| <b>SOD2</b>        | 5'-TCAATGGTGGGGGACATATT-3'    | 5'-GAACCTTGGACTCCCACAGA-3'      |
| <b>Catalase</b>    | 5'-CCTCGTTCAGGATGTGGTTT-3'    | 5'-TCTGGTGATATCGTGGGTGA-3'      |
| <b>GPX1</b>        | 5'-GTCCACCGTGTATGCCTTCT-3'    | 5'-TCTGCAGATCGTTCATCTCG-3'      |
| <b>b-actin</b>     | 5'-TGTTACCAACTGGGACGACA-3'    | 5'-GGGGTGTTGAAGGTCTCAA-3'       |
